# Supplementary material
Source: MDPI journal article supplement (https://www.mdpi.com/2227-9040/9/4/76)
Supplement: s1 [file s1]

## Supplementary Materials

# Flexible Potentiometric Sensor System for Non-Invasive Determination of Antioxidant Activity of Human Skin: Application for Evaluating Effectiveness of Phytocosmetic Products

Aleksey V. Tarasov, Ekaterina I. Khamzina, Maria A. Bukharinova and Natalia Yu. Stozhko

Scientific and Innovation Center of Sensor Technologies, Department of Physics and Chemistry, Ural State University of Economics  
8 Marta St., 62, 620144 Yekaterinburg, Russia  
tarasov\_a.v@bk.ru (A.V.T.); xei260296@mail.ru (E.I.K.); mbuharinova@mail.ru (M.A.B.); sny@usue.ru (N.Y.S.)

**Table S1.** Specification of the carbon veil used in the study.

| Indicator                                                      | Value <sup>1</sup>     |
|----------------------------------------------------------------|------------------------|
| Precursor                                                      | Polyacrylonitrile      |
| Fiber                                                          | Carbon                 |
| Binder                                                         | Polyester              |
| Weave                                                          | Non-woven fiber        |
| Thickness at 2 kPa                                             | 0.52 mm                |
| Surface density                                                | 30 g m <sup>-2</sup>   |
| Specific tensile strength along and across the cloth, not less | 0.5 N mm <sup>-2</sup> |
| Specific surface resistivity along and across the cloth        | 8–10 Ω                 |
| Mass fraction of carbon, not less                              | 90 %                   |

<sup>1</sup> According to the M-Carbo Ltd. (Minsk, Belorussia).

### Single-Sided Hot Lamination Technology

Single-sided hot lamination is achieved by thermal bonding of carbon veil (CV) with a polymer substrate based on polyethylene terephthalate (PET). A piece of CV and a sheet of paper are put in the lamination pouch, which is fed between the heated rolls of the laminator. The best degree of adhesion is observed at the maximum temperature (180 °C) recommended by the laminator manufacturer for the selected sheet thickness (0.25 mm). Next, one polymer layer and the sheet of paper are removed. The remaining part is cut into 3 × 35 mm strips. The resulting electrodes are marked CV/PET and used as indicator flexible film electrodes (FFEs) as part of a flexible potentiometric sensor system (FPSS). It is worth noting that single-sided hot lamination is a scalable technology [1]. Thus, when using a 204 × 291 mm CV, 565 3 × 35 mm CV/PET electrodes are obtained.

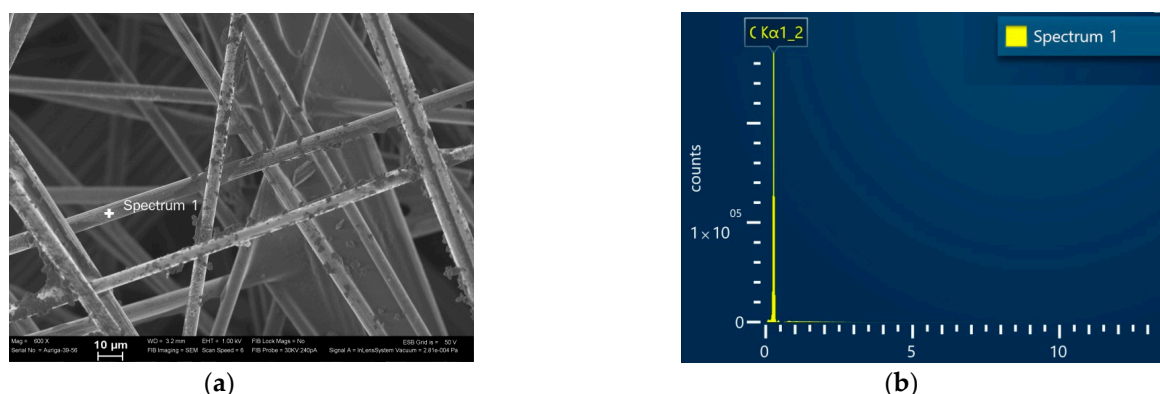

**Figure S1.** SEM-images (a) and EDS spectrum (b) of CV/PET.

**Table S2.** Characteristics of commercially available phytocosmetic products used in this study.

| Name                                                  | Ingredients with Antioxidant Properties (INCI <sup>1</sup> )                                                                                                                                                                                                                                                                                                                                                                                                                                                                           |
|-------------------------------------------------------|----------------------------------------------------------------------------------------------------------------------------------------------------------------------------------------------------------------------------------------------------------------------------------------------------------------------------------------------------------------------------------------------------------------------------------------------------------------------------------------------------------------------------------------|
| Face <b>Cream-Mousse</b> for Dry and Sensitive Skin   | Prunus Amygdalus Dulcis (Sweet Almond) Oil, Butyrospermum Parkii (Shea Butter), Chamomilla Recutita (Matricaria) Flower/Leaf Extract, Rubus Chamaemorus Seed Oil, Aloe Barbadensis Leaf Juice, Fomes Officinalis (Mushroom) Extract, Glycine Soja (Soybean) Oil, PEG-40 Hydrogenated Castor Oil, Tropaeolum Majus Flower/Leaf/Stem Extract                                                                                                                                                                                             |
| Face <b>Cream-Gel</b> for Normal and Combination Skin | Punica Granatum Fruit Juice, Chamomilla Recutita (Matricaria) Flower/Leaf Extract, Aloe Barbadensis Leaf Juice, Fomes Officinalis (Mushroom) Extract, Glycine Soja (Soybean) Oil, Macadamia Integrifolia Seed Oil, PEG-40 Hydrogenated Castor Oil, Prunus Amygdalus Dulcis (Sweet Almond) Oil, Tocopherol, Tropaeolum Majus Flower/Leaf/Stem Extract                                                                                                                                                                                   |
| <b>Serum</b> for Face and Neck                        | Prunus Amygdalus Dulcis (Sweet Almond) Oil, Rhodiola Rosea Root Extract, Avena Sativa (Oat) Kernel Protein, Panax Ginseng Root Extract, Trifolium Pratense (Clover) Flower Extract, Carum Petroselinum (Parsley) Extract, Hippophae Rhamnoides Fruit Juice, Hippophae Rhamnoides Oil, Verbena Officinalis Extract, Amorphophallus Konjac Root Extract, Hamamelis Virginiana (Witch Hazel) Water, Arnica Montana Flower Water, Niacinamide, Tocopherol Acetate, Glycine Soja (Soybean) Oil, PEG-40 Hydrogenated Castor Oil, Citric Acid |
| Face <b>Day Cream</b> for All Types of Skin           | Butyrospermum Parkii (Shea Butter), Macadamia Integrifolia Seed Oil, Verbena Officinalis Extract, Oenothera Biennis (Evening Primrose) Oil, Linum Usitatissimum (Lineseed) Seed Oil, Hippophae Rhamnoides Fruit Juice, Hippophae Rhamnoides Oil, Rubus Chamaemorus Seed Oil, Glycine Soja (Soybean) Oil, Hydrolyzed Wheat Protein, Olea Europaea (Olive) Fruit Oil, PEG-40 Hydrogenated Castor Oil, Triticum Vulgare (Wheat) Germ Oil                                                                                                  |
| Face <b>Nourishing Night Cream</b> for Dry Skin       | Butyrospermum Parkii (Shea Butter), Macadamia Integrifolia Seed Oil, Triticum Vulgare (Wheat) Germ Oil, Aloe Barbadensis Leaf Juice, Bisabolol, Glycine Soja (Soybean) Oil, PEG-40 Hydrogenat-ed Castor Oil                                                                                                                                                                                                                                                                                                                            |

<sup>1</sup> INCI: International Nomenclature of Cosmetic Ingredients.

**Table S3.** Composition of the buffer solution pH 5 used in the study.

| Salt                                                                                                                                          | Concentration        |                    |
|-----------------------------------------------------------------------------------------------------------------------------------------------|----------------------|--------------------|
|                                                                                                                                               | mmol L <sup>-1</sup> | g L <sup>-1</sup>  |
| NaCl                                                                                                                                          | 137                  | 8.0                |
| KCl                                                                                                                                           | 2.7                  | 0.2                |
| Na <sub>2</sub> HPO <sub>4</sub> / Na <sub>2</sub> HPO <sub>4</sub> ×2H <sub>2</sub> O / Na <sub>2</sub> HPO <sub>4</sub> ×12H <sub>2</sub> O | 0.63                 | 0.09 / 0.11 / 0.23 |
| KH <sub>2</sub> PO <sub>4</sub>                                                                                                               | 66                   | 8.99               |

**Table S4.** Results of L-ascorbic acid determination using FPSS under model conditions (n = 4).

| Added, $\mu\text{M-eq}$ | Found, $\mu\text{M-eq}$ | RSD, % | Recovery, %  |
|-------------------------|-------------------------|--------|--------------|
| 10.0                    | 14.2 $\pm$ 1.0          | 7.3    | 142 $\pm$ 10 |
| 15.0                    | 15.8 $\pm$ 0.9          | 5.5    | 105 $\pm$ 6  |
| 20.0                    | 20.4 $\pm$ 0.7          | 3.2    | 102 $\pm$ 3  |
| 50.0                    | 49.0 $\pm$ 0.7          | 1.5    | 98 $\pm$ 1   |
| 100.0                   | 98.9 $\pm$ 1.4          | 1.4    | 99 $\pm$ 1   |
| 500.0                   | 491.5 $\pm$ 7.0         | 1.4    | 98 $\pm$ 1   |
| 990.0                   | 955.4 $\pm$ 12.3        | 1.3    | 96 $\pm$ 1   |

**Table S5.** Effectiveness of commercially available phytocosmetic products.

| Phytocosmetic Product  | In vitro analysis by HPM [2, 3]      | In vivo analysis by CHPM [3, 4]         |          |
|------------------------|--------------------------------------|-----------------------------------------|----------|
|                        | AOA, $\mu\text{M-eq g}^{-1}$ (n = 3) | $\Delta\text{AOA}_{\text{max}}$ , mM-eq | t, h     |
| Cream-mousse           | 0.075 $\pm$ 0.009                    | 0.047                                   | $\leq$ 5 |
| Cream-gel              | 0.112 $\pm$ 0.010                    | 0.125                                   | $\leq$ 5 |
| Serum                  | 0.213 $\pm$ 0.018                    | 0.875                                   | $\leq$ 5 |
| Day cream              | 0.114 $\pm$ 0.011                    | 0.077                                   | $\leq$ 8 |
| Nourishing night cream | 0.145 $\pm$ 0.012                    | 0.150                                   | $>$ 8    |

<sup>1</sup> HPM: hybrid potentiometric method; CHPM: contact hybrid potentiometric method; AOA: antioxidant activity;  $\Delta\text{AOA}_{\text{max}}$ : maximum value of effectiveness of the phytocosmetic product; t: duration of effectiveness of the phytocosmetic product or duration of antioxidant effect.

**Table S6.** The theoretical range of the AOA determined values.

| Mediator                                  |                                           |           | Theoretical Range at 25 °C |                       |
|-------------------------------------------|-------------------------------------------|-----------|----------------------------|-----------------------|
| $\text{K}_3[\text{Fe}(\text{CN})_6]$ , mM | $\text{K}_4[\text{Fe}(\text{CN})_6]$ , mM | Stability | $\Delta\text{E}$ , mV      | AOA, $\mu\text{M-eq}$ |
| 1                                         | 0.01                                      | Low       | 10 – 295                   | 5 – 999               |
| 1                                         | 0.05                                      | Good      | 7 – 255                    | 15 – 999              |
| 5                                         | 0.1                                       | High      | 5 – 311                    | 21 – 4999             |

## References

- Gonzalez-Macia, L.; Killard, A.J. Screen printing and other scalable point of care (POC) biosensor processing technologies. In *Medical Biosensors for Point of Care (POC) Applications*; Narayan, R.J., Ed.; Elsevier: Amsterdam, The Netherlands, 2017; Chapter 4, pp. 69–98; <https://doi.org/10.1016/B978-0-08-100072-4.00004-6>.
- Brainina, K.; Stozhko, N.; Bukharinova, M.; Khamzina, E.; Vidrevich, M. Potentiometric method of plant microsuspensions antioxidant activity determination. *Food Chem.* **2019**, *278*, 653–658; <https://doi.org/10.1016/j.foodchem.2018.11.098>.
- Brainina, K.Z.; Kazakov, Y.E. Electrochemical hybrid methods and sensors for antioxidant/oxidant activity monitoring and their use as a diagnostic tool of oxidative stress: Future perspectives and challenges. *Chemosensors* **2020**, *8*(4), 90. <https://doi.org/10.3390/chemosensors8040090>.
- Brainina, K.; Tarasov, A.; Khamzina, E.; Kazakov, Y.; Stozhko, N. Disposable potentiometric sensory system for skin antioxidant activity evaluation. *Sensors* **2019**, *19*(11), 2586; <https://doi.org/10.3390/s19112586>.
